# Supplementary material for: Magnolia officinalis Extract Contains Potent Inhibitors against PTP1B and Attenuates Hyperglycemia in db/db Mice
Source: PubMed Central journal article supplement (PMC4439476; doi:10.1155/2015/139451), 2015-05-07
Supplement: 139451.f1.pdf [file 139451.f1.pdf]

## Supplementary materials

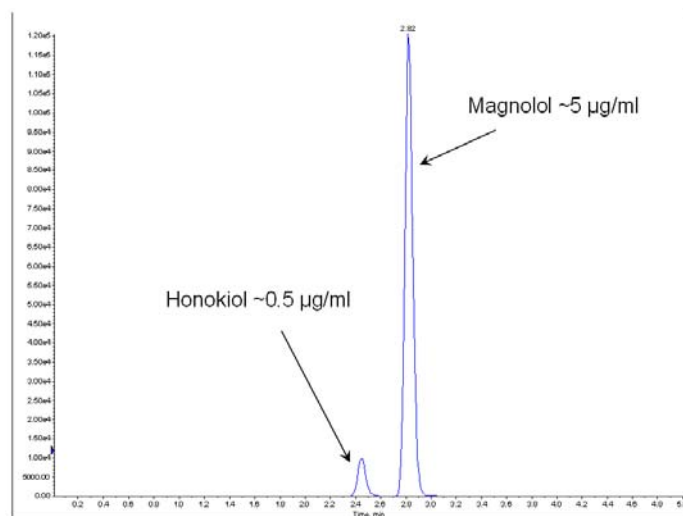

**FIGURE S1** The quantitative analysis of magnolol and honokiol in ME by HPLC-MS/MS. The concentration of ME is 10 µg/mL. The content of magnolol and honokiol in ME is about 5 µg/mL and 0.5 µg/mL respectively.

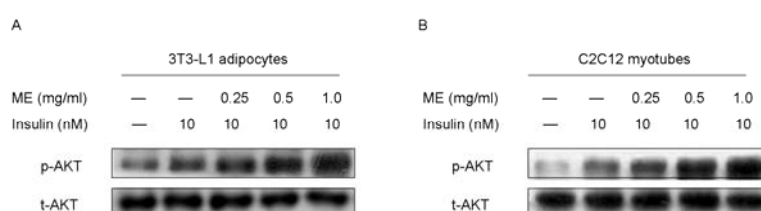

**Figure S2** Effects of ME on Akt. Differentiated 3T3-L1 adipocytes (A) and C2C12 myotubes (B) were starved for 4 h before stimulation. The cells were incubated with vehicle or ME at various concentrations for 30 min and then stimulated with vehicle or 10 nM insulin for 5 min. The levels of t-Akt and p-Akt were determined by western blotting with anti-Akt (Cell Signaling Technology #9272) and anti-phospho-Akt (Cell Signaling Technology #9611) antibodies.

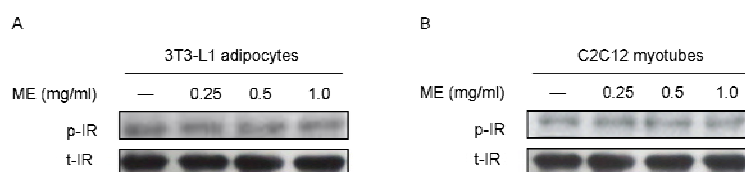

**Figure S3** The effect of ME alone on IR. Differentiated 3T3-L1 adipocytes (A) and C2C12 myotubes (B) were starved for 4 h before stimulation. The cells were incubated with vehicle or ME at various concentrations for 30 min. Tyrosine phosphorylations of IR were determined by western blotting with anti-phospho-IR $\beta$  antibodies.

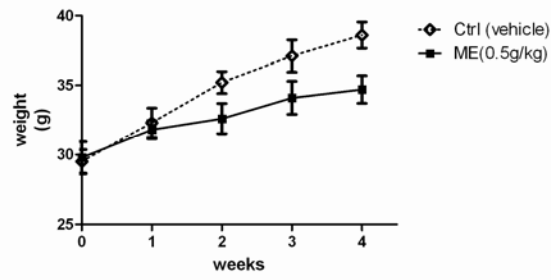

**Figure S4 The effect of ME on body weight.** Mice were orally treated with 0.9% saline alone (vehicle) and ME (0.5 g/kg) once a day for 4 weeks. Body weight of 16 h fasted mice were monitored every week (n=10).
